# Supplementary material for: Association between serum uric acid levels and clinical outcomes in patients with acute kidney injury
Source: PubMed Central journal article supplement (PMC10120524; doi:10.1080/0886022x.2023.2169617), 2023-04-19
Supplement: IRNF_A_2169617_SM9816.pdf [file IRNF_A_2169617_SM9816.pdf]

Table S1. Number of patients (%) for serum creatinine tests

| Number of serum creatinine tests | Number (%)   |
|----------------------------------|--------------|
| 2                                | 93585(58.8%) |
| 3                                | 30070(18.9%) |
| 4                                | 16164(10.2%) |
| 5                                | 7500(4.7%)   |
| 6                                | 4204(2.6%)   |
| 7                                | 2108(1.3%)   |
| 8                                | 1394(0.9%)   |
| 9                                | 778(0.5%)    |
| 10                               | 600(0.4%)    |
| >10                              | 2642(1.7%)   |

The average number of tests for serum creatinine was 3.
